# Supplementary material for: Sustained copper-releasing adhesive hydrogel patch promotes optimized scarless tongue wound healing via antioxidative, angiogenic and antifibrotic synergy
Source: Royal Society of Chemistry journal article supplement (doi:10.1039/d5tb02753e), 2025-12-31
Supplement: d5tb02753e1.pdf [file d5tb02753e1.pdf]

**Sustained copper-releasing adhesive hydrogel patch promotes optimized scarless tongue wound healing via antioxidative, angiogenic and antifibrotic synergy**

Yutang Ding,<sup>†ab</sup> Kun Tang,<sup>†ab</sup> Yuheng Zhang,<sup>ab</sup> Linxin Yang,<sup>ab</sup> Binjing Zhang,<sup>ab</sup> Xin Zhang<sup>\*ab</sup> and Jian Wang<sup>\*ab</sup>

<sup>a</sup> State Key Laboratory of Oral Diseases & National Center for Stomatology & National Clinical Research Center for Oral Diseases, West China Hospital of Stomatology, Sichuan University, Chengdu 610041, Sichuan, China

<sup>b</sup> Department of Prosthodontics, West China Hospital of Stomatology, Sichuan University, Chengdu 610041, Sichuan, China

<sup>†</sup> These authors contributed equally to this work.

<sup>\*</sup> Corresponding authors.

E-mail addresses: zhangxinx@scu.edu.cn (Xin Zhang), fero@scu.edu.cn (Jian Wang).

## Supplementary Information

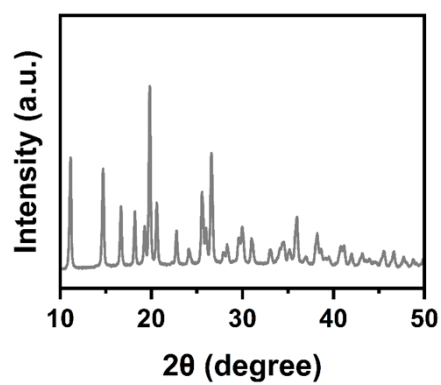

**Fig. S1** X-ray diffraction (XRD) pattern of the synthesized *L*-Asp-Cu MOF.

| Primer                 | Sequence (5' to 3')   |
|------------------------|-----------------------|
| human- <i>Vegfa</i> -F | AGGGCAGAATCATCACGAAGT |
| human- <i>Vegfa</i> -R | AGGGTCTCGATTGGATGGCA  |
| human- <i>Fgf2</i> -F  | AGTGTGTGCTAACCGTTACCT |
| human- <i>Fgf2</i> -R  | ACTGCCCAGTTCGTTTCAGTG |
| rat- <i>Tgfβ1</i> -F   | CCCACTGATACGCCTGAG    |
| rat- <i>Tgfβ1</i> -R   | TGAAGCGAAAGCCCTGTA    |
| rat- <i>Colla1</i> -F  | CACGCATGAGCCGAAGCTAA  |
| rat- <i>Colla1</i> -R  | GGAGGTCCACAAAGCTGAAC  |
| rat- <i>Col3a1</i> -F  | GGACCAGGCAATGATGGGAA  |
| rat- <i>Col3a1</i> -R  | CAGGGAAACCCATGACACCA  |

**Table S1** Primer sequences of RT-qPCR analysis.

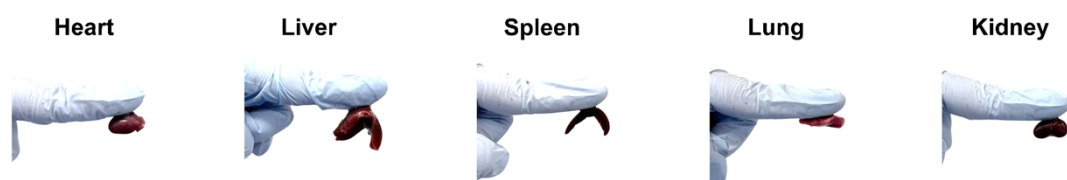

**Fig. S2** Adhesion of CPTCu hydrogel patch to different organ surfaces.

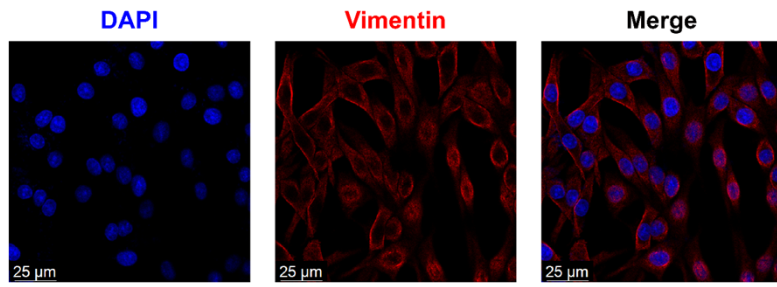

**Fig. S3** Immunofluorescence staining of Vimentin in the extracted primary tongue fibroblasts.

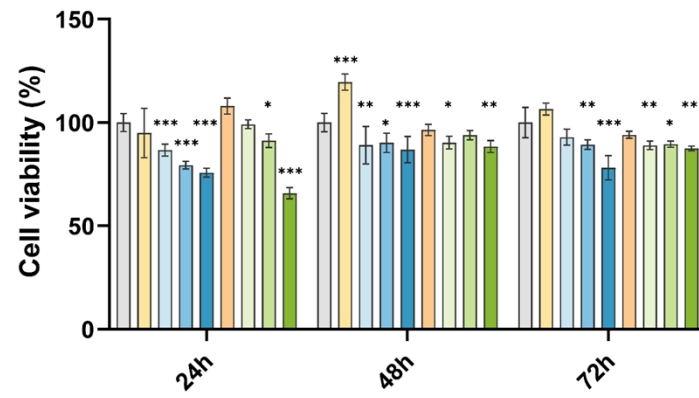

**Fig. S4** Viability of tongue fibroblasts treated with CP, CPCu, CPT, CPTCu and control for 24 h, 48 h, and 72 h. n = 5 per group.

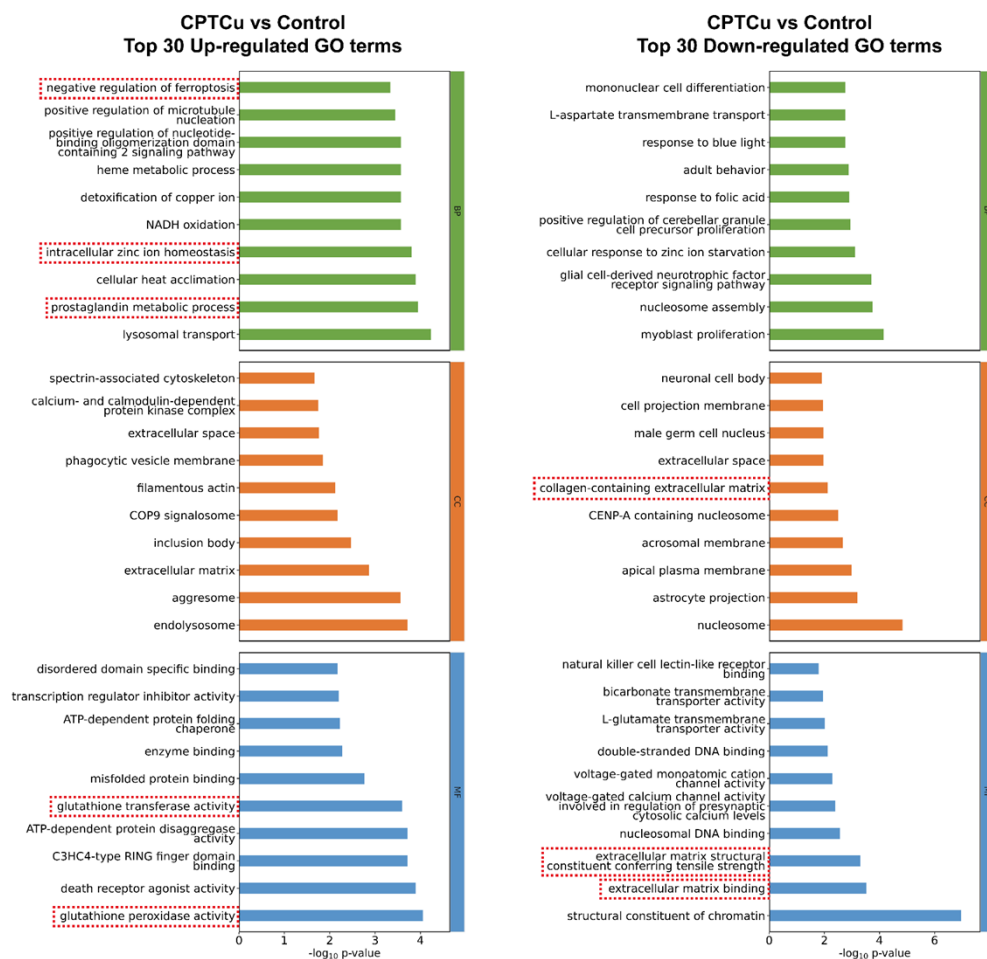

**Fig. S5** The top 30 up- and down-regulated GO enrichment terms of biological process, cellular component, and molecular function in CPTCu group compared with control.

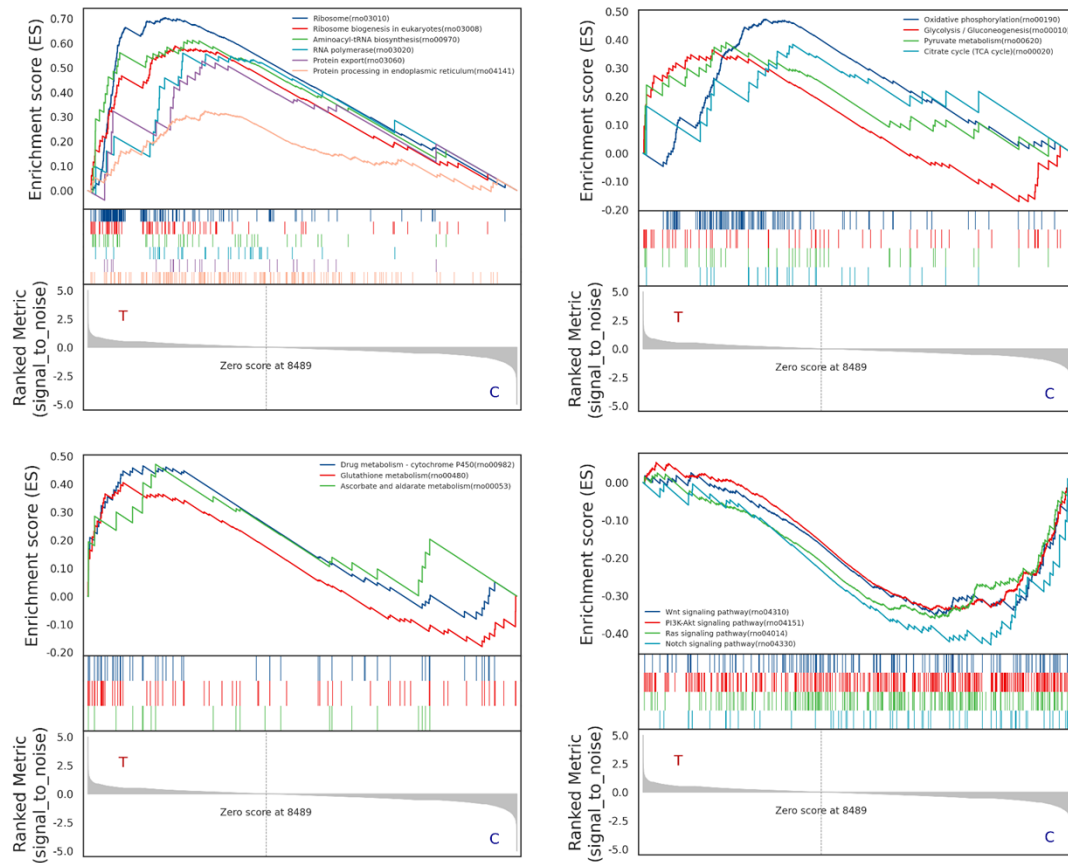

**Fig. S6** GSEA analysis showing positively-enriched gene sets related to protein synthesis, energy metabolism, and antioxidant and detoxification processes, and negatively-enriched gene sets related to fibrosis in CPTCu group compared with control.



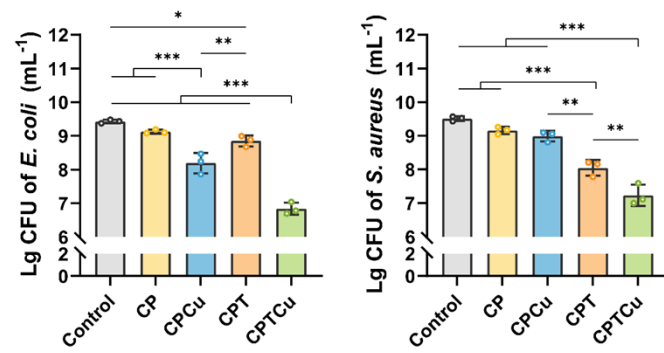

**Fig. S7** Lg CFU values of *E. coli* and *S. aureus* after culturing with hydrogel extracts.

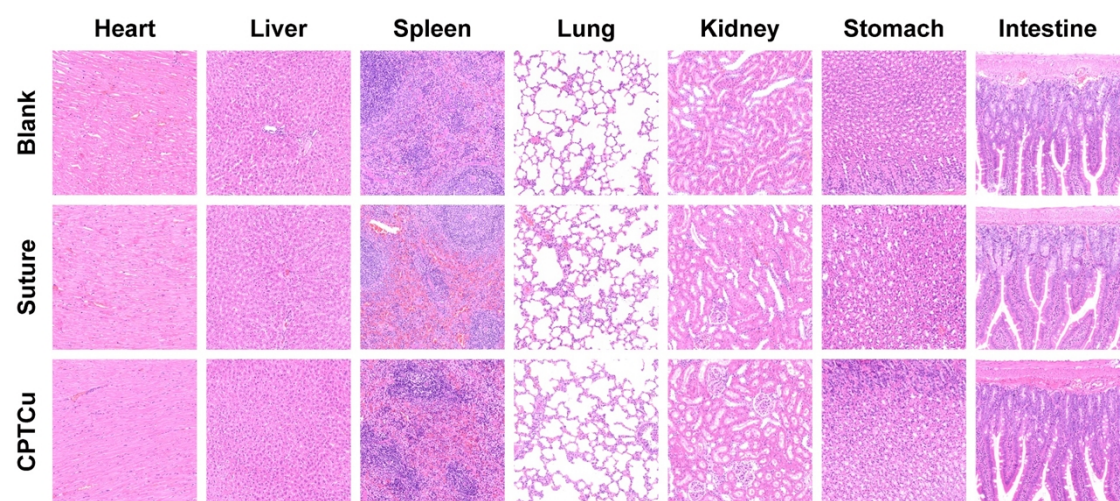

**Fig. S8** H&E staining of the main organs from rats in blank, suture and CPTCu group.
